# Supplementary material for: Freshening of Antarctic Intermediate Water in the South Atlantic Ocean in 2005–2014
Source: Copernicus journal article supplement (doi:10.5194/os-13-521-2017), 2017-07-06
Supplement: Supplementary file 1 [file os-13-521-2017-supplement.pdf]

Supplement of Ocean Sci., 13, 521–530, 2017  
<https://doi.org/10.5194/os-13-521-2017-supplement>  
© Author(s) 2017. This work is distributed under  
the Creative Commons Attribution 3.0 License.

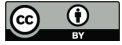

*Supplement of*

## **Freshening of Antarctic Intermediate Water in the South Atlantic Ocean in 2005–2014**

**Wenjun Yao et al.**

*Correspondence to:* Wenjun Yao ([wjimyao@gmail.com](mailto:wjimyao@gmail.com))

The copyright of individual parts of the supplement might differ from the CC BY 3.0 License.

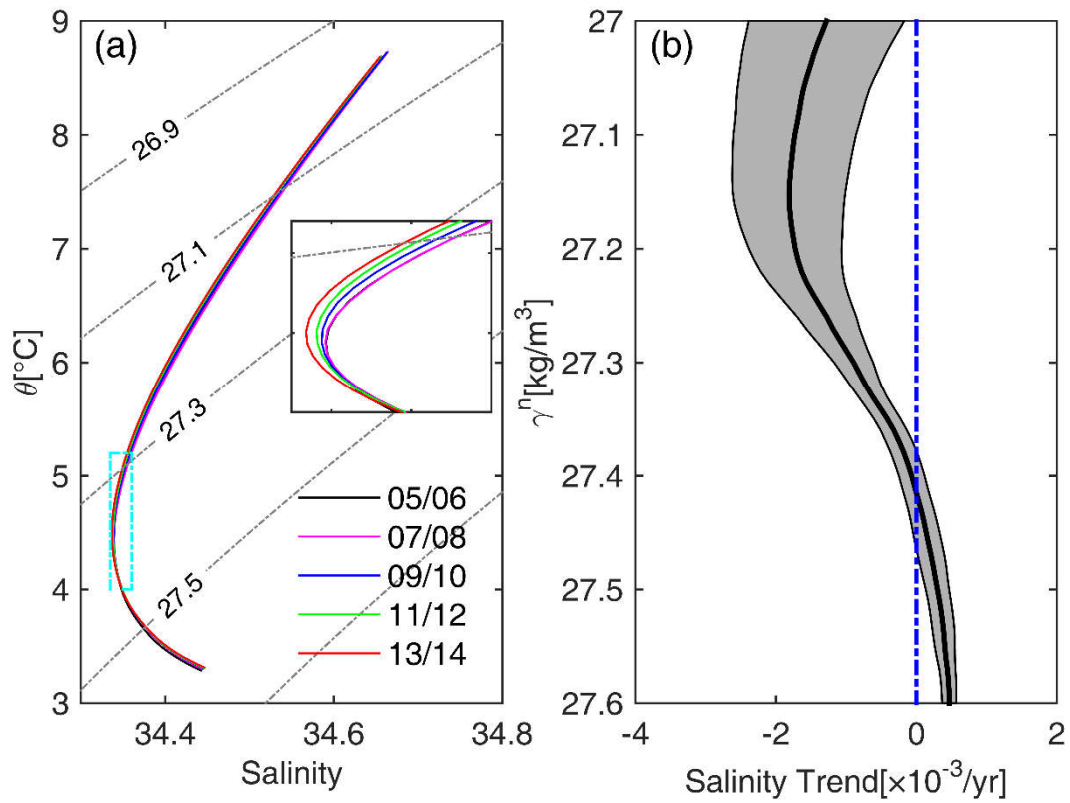

Supplementary 1 (a) Biennial mean  $\theta$ - $S$  diagram averaged over Region A for JAMSTEC data with  $\gamma^n$  surfaces superimposed (grey solid-dotted lines). The inserted figure is the magnification of the area delineated by cyan solid-dotted box. The corresponding time for each  $\theta$ - $S$  curve is listed in the bottom-right corner (i.e. 05/06 for 2005-2006). (b) Salinity trend along  $\gamma^n$  surfaces for period Jan 2005 - Dec 2014 is displayed by the thick black line, and the 95% confidence intervals ( $F$ -test) are represented by the light grey shadings, calculated from the JAMSTEC data.

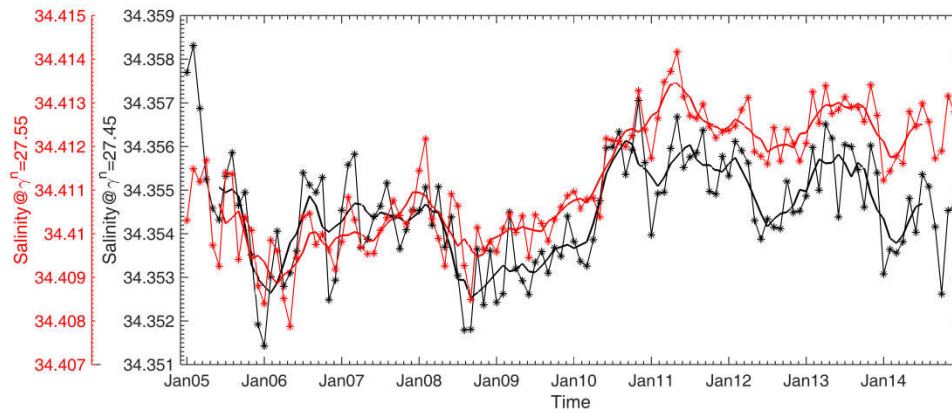

Supplementary 2 Time series of monthly salinity on the  $27.45\sigma^t$  (black) and  $27.55\sigma^t$  (red) surfaces, calculated from the IPRC data and averaged over the Region A shown in Fig. 2. Thin star lines and thick lines represent monthly and 13-month running mean values, respectively.

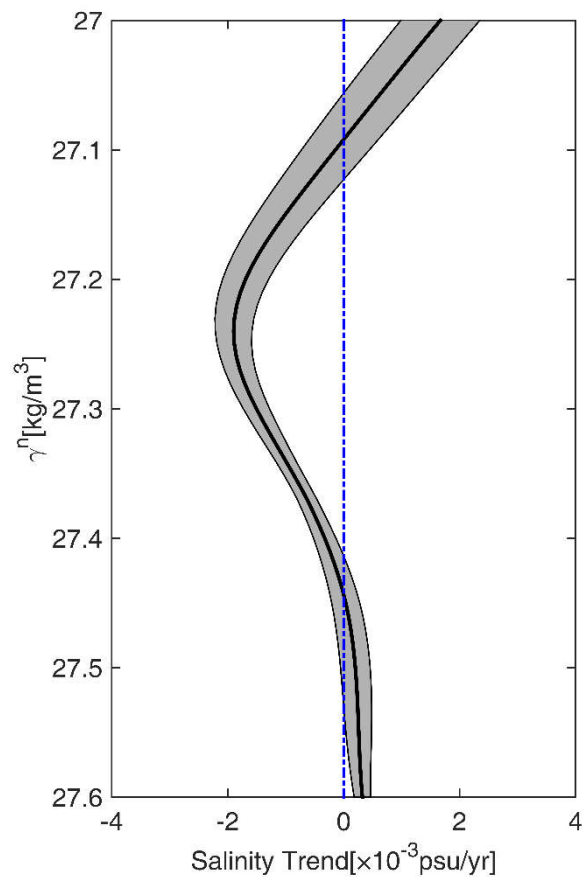

Supplementary 3 Salinity trend along  $\gamma^{\theta}$  surfaces for period Jan 2005 - Dec 2014 is displayed by the thick black line, and the 95% confidence intervals ( $F$ -test) are represented by the light grey shadings, calculated from the SODA data.
